# Supplementary material for: Corrosion Inhibition of Mild Steel and 304 Stainless Steel in 1 M Hydrochloric Acid Solution by Tea Tree Extract and Its Main Constituents
Source: Materials (Basel). 2021 Sep 2;14(17):5016. doi: 10.3390/ma14175016 (PMC8433979; doi:10.3390/ma14175016)
Supplement: Supplementary file 1 [file materials-14-05016-s001.zip › materials-1334500-SI.pdf]

# Corrosion Inhibition of Mild Steel and 304 Stainless Steel in 1 M Hydrochloric Acid Solution by Tea Tree Extract and Its Main Constituents

Jae-Yeon Kim <sup>1,2,†</sup>, InJi Shin <sup>3,\*</sup> and Jai-Won Byeon <sup>4,\*</sup>

<sup>1</sup> Program of Material Science and Engineering, Convergence Institute of Biomedical Engineering and Biomaterials, Seoul National University of Science and Technology, Seoul 01811, Korea

<sup>2</sup> Department of Mining and Geological Engineering, University of Arizona, Tucson, AZ 85721, USA

<sup>3</sup> Department of Fine Chemistry, Seoul National University of Science and Technology, Seoul 01811, Korea

<sup>4</sup> Department of Materials Science and Engineering, Seoul National University of Science and Technology, Seoul 01811, Korea

\* Correspondence: inji@seoultech.ac.kr (I.S.); @seoultech.ac.kr (J.-W.B.); Tel.: +82-2-970-6690 (I.S.); +82-2-970-6634

† Present address: Department of Mining and Geological Engineering, University of Arizona, Tucson, AZ 85721, USA.

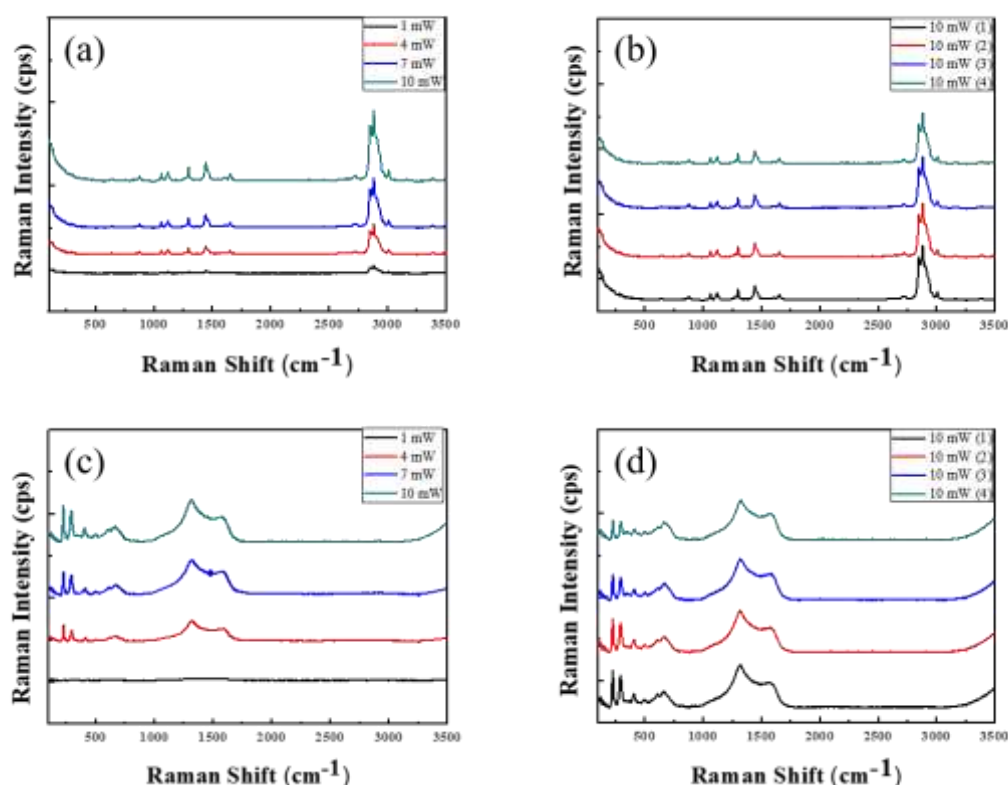

**Figure S1.** Raman spectra analyzed with 1, 4, 7, and 10 mW laser power from (a,b) the extract itself and (c,d) the corroded surface of the MS specimen without the extract. Thermal degradation with 10 mW laser power was checked via repetitive analysis at one spot, as shown in (b,d).

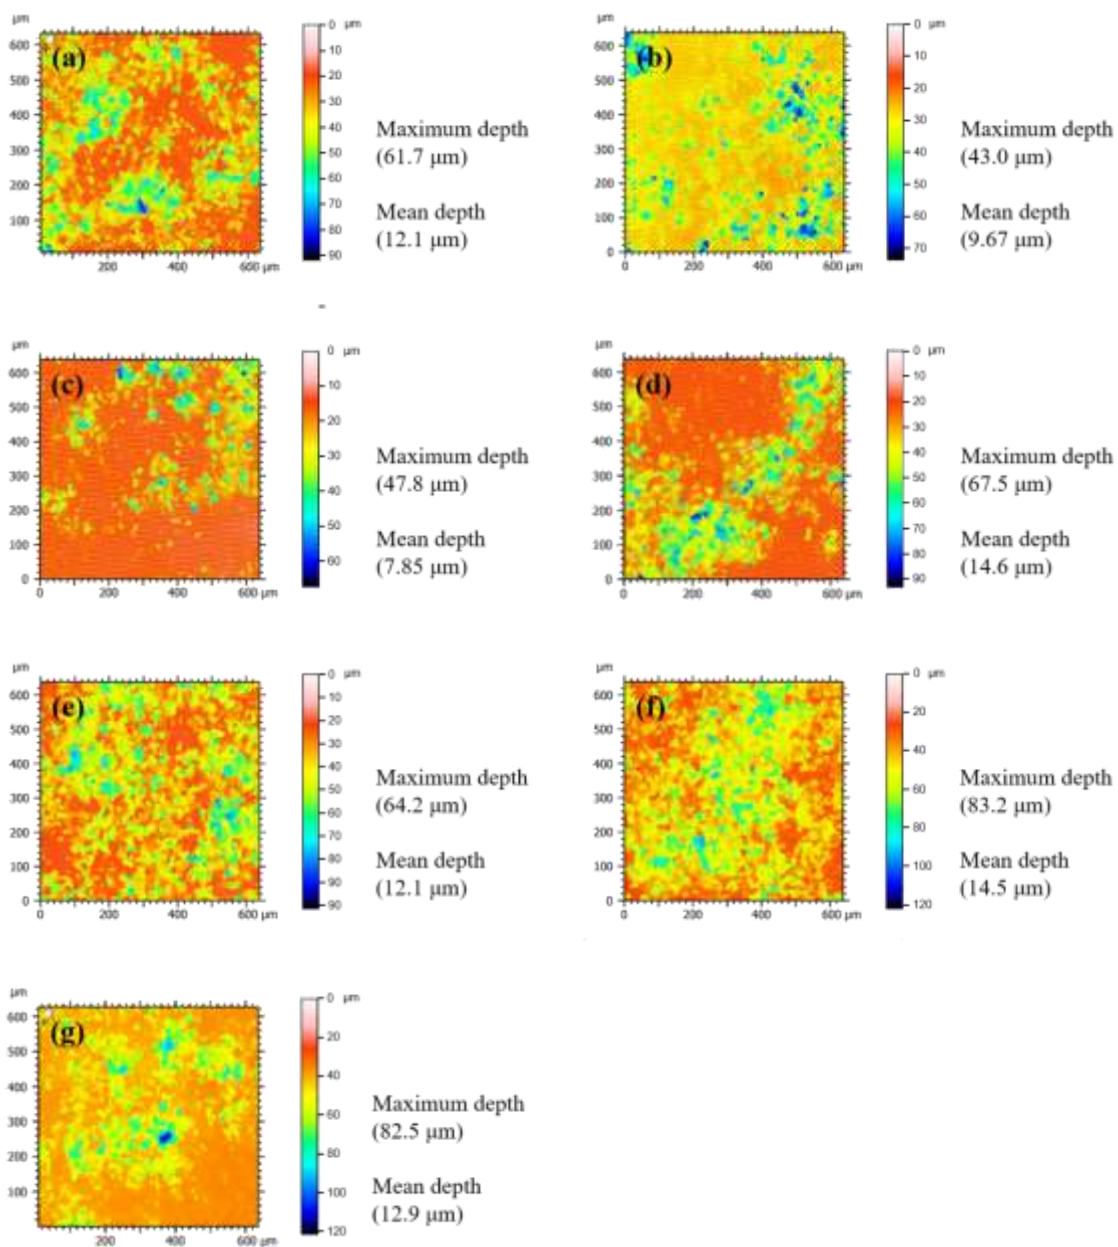

**Figure S2.** (a–g) LSCM images showing the surface morphology of corroded 304 STS specimens after immersion in 1M HCl solution at 298 K without tea tree extract.

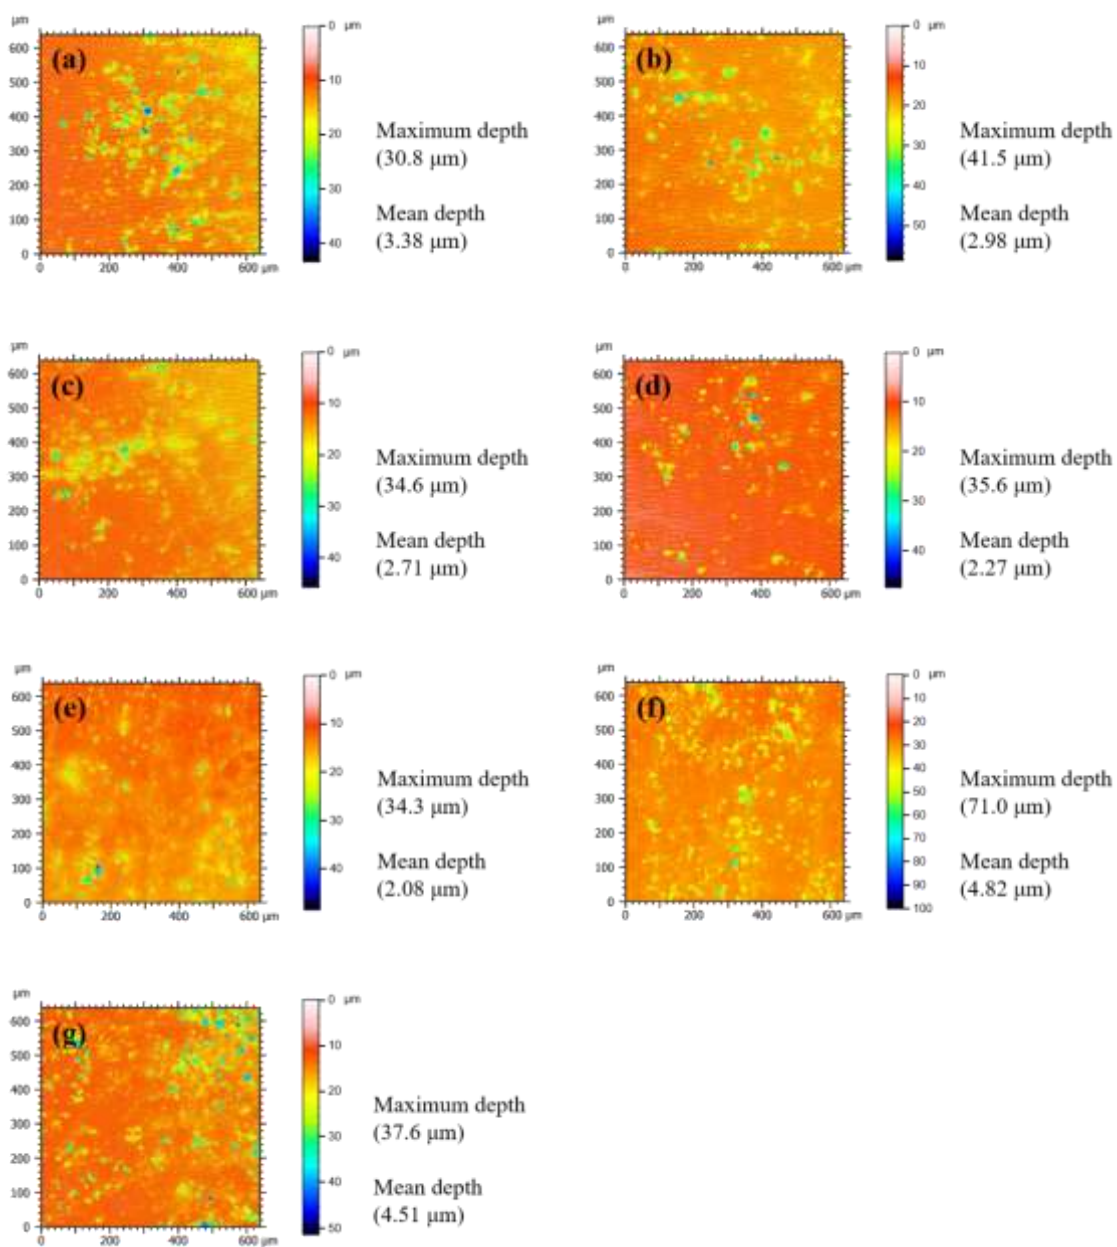

**Figure S3.** (a–g) LSCM images showing the surface morphology of corroded 304 STS specimens after immersion in 1M HCl solution at 298 K with 0.75 g/L of tea tree extract.

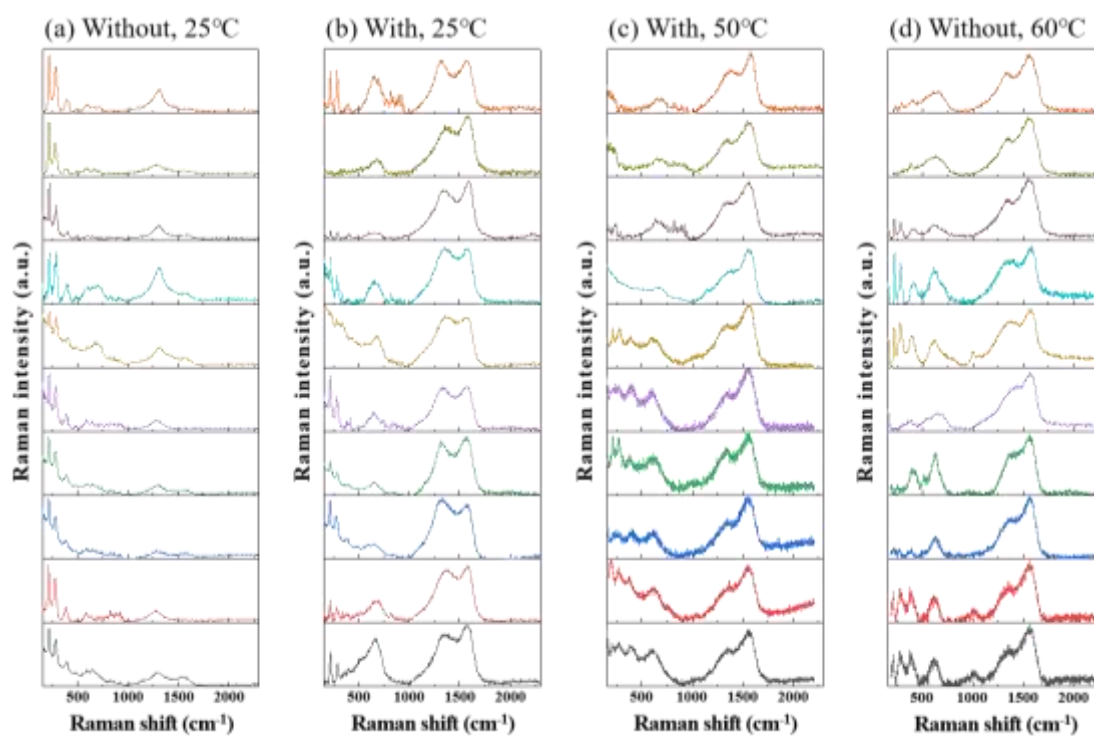

**Figure S4.** Raman spectra analyzed from the surface of MS specimens after immersion for 24 h in 1 M HCl solution at (a,b) 298, (c) 323 and (d) 333 K with 0.75 g/L of tea tree extract.

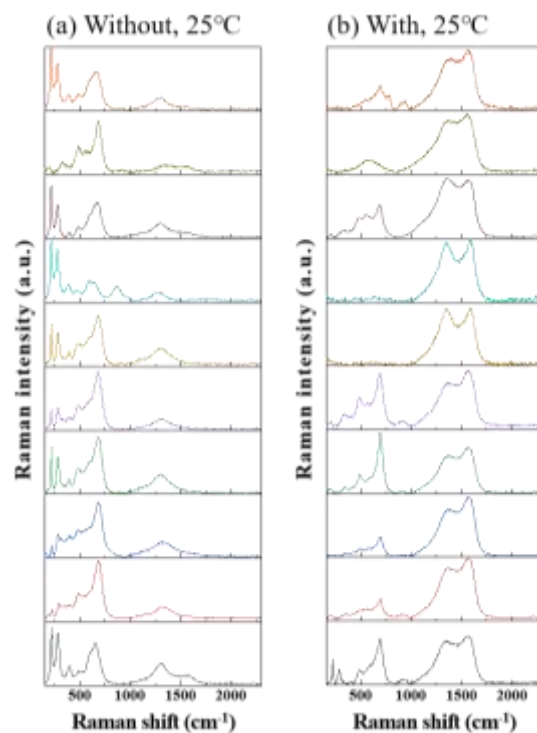

**Figure S5.** Raman spectra analyzed from the surface of STS specimens after immersion for 168 h in 1 M HCl solution at 298 K (a) without and (b) with 0.75 g/L of tea tree extract.

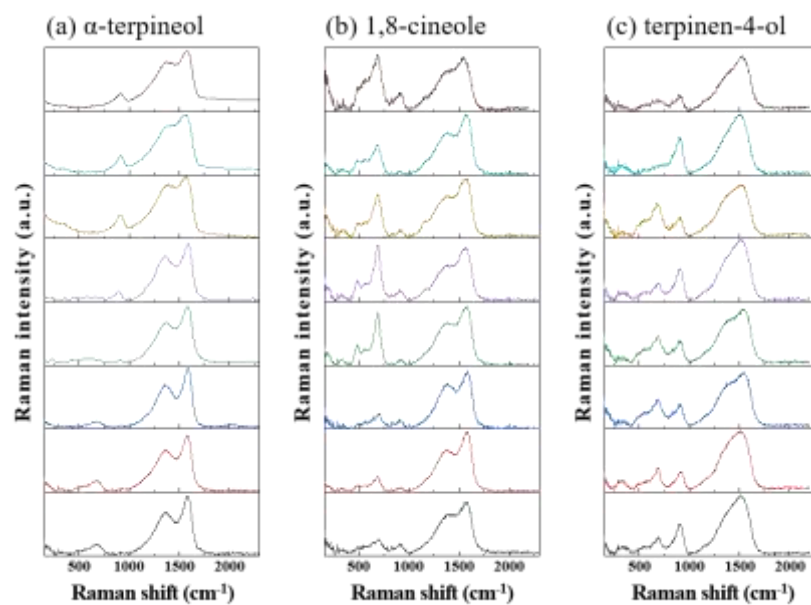

**Figure S6.** Raman spectra analyzed from the surface of STS specimens after immersion for 168 h in 1 M HCl solution at 298 K with 0.75 g/L of (a)  $\alpha$ -terpineol, (b) 1,8-cineole and (c) terpinen-4-ol.

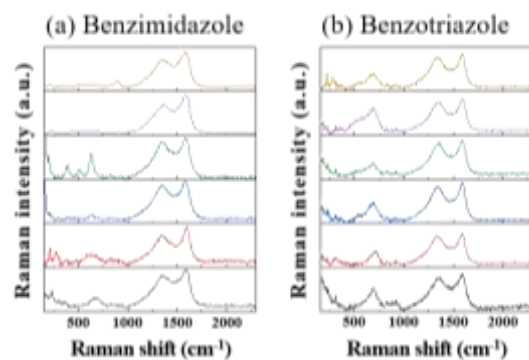

**Figure S7.** Raman spectra analyzed from the surface of STS specimens after immersion for 168 h in 1 M HCl solution at 298 K with (a) benzimidazole and (b) benzotriazole.
